# Supplementary material for: ARGOS8 variants generated by CRISPR‐Cas9 improve maize grain yield under field drought stress conditions
Source: PubMed Central journal article supplement (PMC5258859; doi:10.1111/pbi.12603), 2016-08-17
Supplement: PBI-15-207-s001.pdf [file PBI-15-207-s001.pdf]

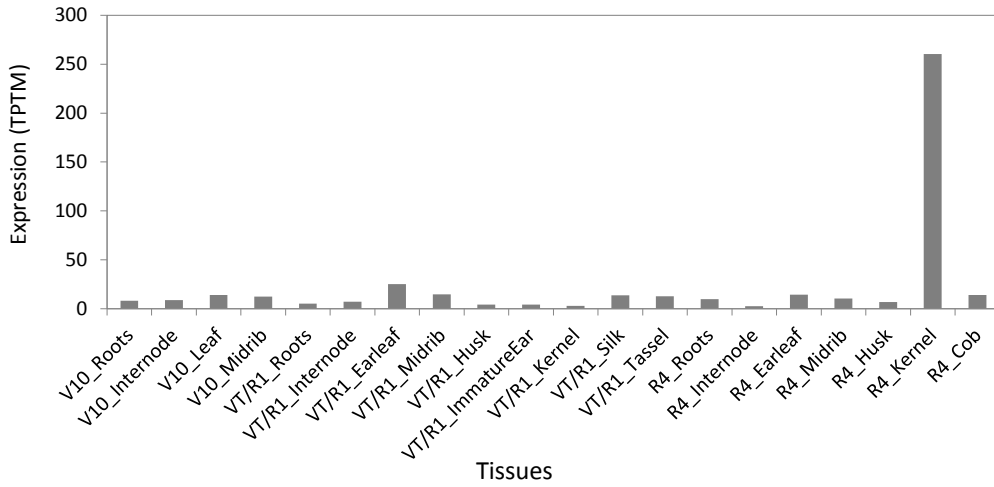

**Figure S1.** Maize *ARGOS8* gene expression. The transcript abundance of *ARGOS8* in various tissues of maize inbred PH184C was measured by RNA sequencing. Samples were taken from the plants at the developmental stage of V10, VT/R1 and R4. TPTM, transcript per ten million.

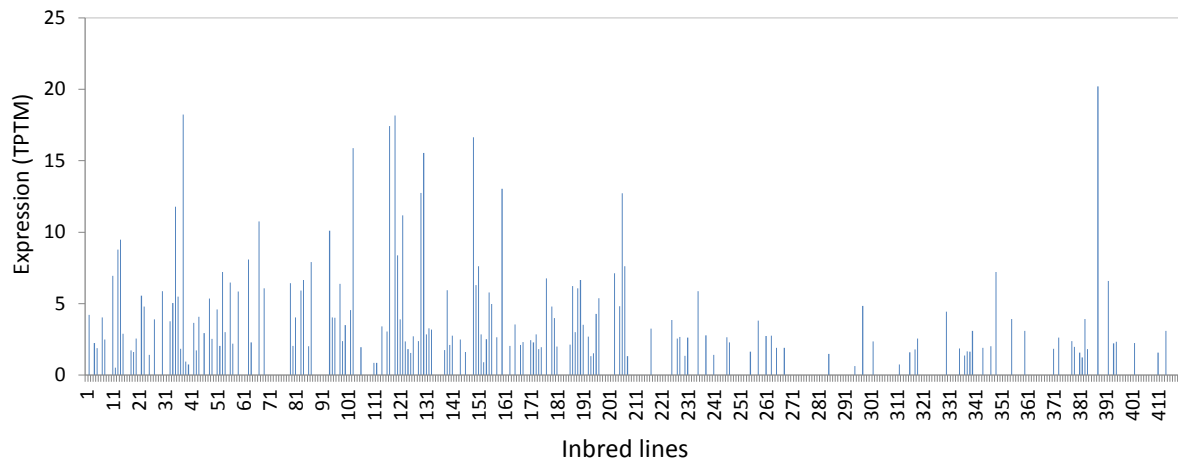

**Figure S2.** Comparison of *ARGOS8* gene expression among 419 maize inbred lines. The *ARGOS8* transcript levels in leaves of 3-week-old seedlings were measured by RNA sequencing. TPTM, transcript per ten million.

(a)

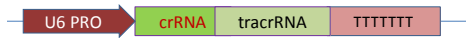

(b)

*CR1*

GC GTGCATCG ATCCATCGCG TTTTAGAGCT AGAAATAGCA AGTTAAAATA AGGCTAGTCC GTTATCAACT TGAAAAAGTG GCACCGAGTC GGTGCT

*CR2*

GCATCATATC TATCCGTAGC CGTTTTAGAG CTAGAAATAG CAAGTTAAAA TAAGGCTAGT CCGTTATCAA CTTGAAAAAG TGGCACCGAG TCGGTGCT

*CR3*

GTTACTTCTC TAAGCACGGC GTTTTAGAGC TAGAAATAGC AAGTTAAAAT AAGGCTAGTC CGTTATCAAC TTGAAAAAGT GGCACCGAGT CCGGTGCT

**Figure S3.** Single guide RNA genes used in editing the genomic sequence of *ARGOS8*. (a) Scheme illustrating the structure of a single guide RNA (sgRNA) gene. (b) DNA sequences of the transcription region in the sgRNA genes *CRISPR RNA1 (CR1)*, *CR2* and *CR3*. U6 PRO, maize U6 polymerase III promoter; crRNA, CRISPR RNA (in red font) functioning as a guide; tracrRNA, trans-activating CRISPR RNA, the sgRNA scaffold.

>ID189\_HR1 junction PCR product (P1/P2), *ARGOS8-v1*

GCGCCATCCCTAAAGGTAAGTAACTAAACAGAACACAATTTTCTTAGGCCATCTCCAGCAGGCTGTGTAACAGCCGTGCAAAATGTTGTTTTGCA  
CTGTTTGTACAGTGAAGTTTTAAATAAAGAGTAAGATAGGAAATGAGATAAAGAGTATTCTGGAGATAGTCTTATACATCACCGTAGCAACGCATT  
AATATATACCTAGTTAATATTATATGATTTAAATTTTATCTTAAATACTTGACGCTCTATGAGTTTAGTAGTTTATAATACATATTTATCTTCTTAA  
TACATGAACATCCTTTTTAGAATACGTCATAGGACGATACCAGTACGGAGGATCTAGGCAAACAACATAAGAATCGAGCGAGTGCTAGGAGCATC  
TCTAAAAGACTAATAAAATAACTCGTAAAGTTAAATTTTATAGATACTCAAGAGTAAATAAATACTATTTAACAGACTCGTTATTTGACTCATCAATATACC  
CTTCAAATTGACTCTCTCACTATCTAAACTTGGCTAGCCACTATGACTAACTAACTAGATAGATATTTTGGTGGAGTAAGATGCTATATATAAAGTG  
TAATATTTATAAAATGATAAATAAAAAGCTAAAAATAAAGAGTTACTTCTCTAAGCACGGCTGGATTTTCAGGCCTCTAGTCTCTACTAGTACTAGCT  
ACACGACGTGCACGCATGCATCAGCATCAACAAGTACAGCAGCACACGCTGCACGCGCCGGGAACCCACTGATCCCCCTTCCCGCGCGC  
GGTTTGATTTCTTCTGTTACGATCCATATCTGAGGGCTGTTTCGGTTATCCCAACACACATGATTGGATGGGATTGAAAAAAAATGAGAA  
GAAGTTTGACTTGTGGGATCAAACCCATCCAATCCACTCAATCCACATGGATTGAGAGCTAACCGAACAAAGCCCTCATAGTACATACCTGGTA  
CGGATCCATATCATAGTACATAGTCCAGTAGAATAGAAGGTGATCCGACCCGCGCGCTTGCCTGTTTTCCCGGTCCATTGAACCTGCCAACCC  
TCCTAACACAGGCACGCAAAACCGCGGCTCCGCGCCACCCGCGCACCTGCCCTGCCGACCTCTCCAACCCAAATCCAGGGGGGGG  
GGGGGACCATGCGTGCATCGATCCATGCTCGTGCCAAGCGTCACTTACGATTAGC

>ID189\_HR2 junction PCR product (P5/P4), *ARGOS8-v1*

ACCGTCCTATCTCTGCATCATCTATCTGTGCTAGTTTCTGCGTCTTCTCAAATATTTCCGGCCTGTGTAGCATGTGACTGATAATATGATTTTGCA  
GCTTCTGCATAAGAACAACAAATCAAAAGCTTGATCAGCTCGGTGCTACAAAACCTCAACAACCAAGTTTCCATGAGCGCTGGCGCGCGGGTCCG  
GCGGGGCGGTGTGAGGGCAAATTTATATAGTCTAGTGGTACCCGGCTACGGATAGATATGATGCTGCACTGCACATTGGCTATATCTGAGG  
CTCTGCGCGCGCTTGGCCAGTGTCTGTCTGCGGGCGATGCCGAGGAAGGAAAGCGCGGTGGCGACGACACCATTGGCCGGGGGCAA  
GGTGGCGCGCTGCTGGCCAGCGCGCGCGCTGCTGCTGCTGCCGCTGGCGCTGCCGCGCTGCCGCGCGCCACGCAGCTGTTGTTG  
TCCCCGTGGTCTGCTCCTCGTGGCGTCCCTCGCTTCTGCCCGCGCGACCCCTCGCGTCCGCGATGCATGCCGCGACCCACGGGCTGTT  
CGGGACCACTGGATCACCGCACCTATGTTGACGCTGACGATGAGAGATCTGCTGATCGACGCTCGGCTTGCATGGCGCTCGGAATCAAGCAG  
TTCGCACACAC

>ID664\_HR1 junction PCR product (P1/P2), *ARGOS8-v2*

GCGCCATCCCTAAAGGTAAGTAACTAAACAGAACACAATTTTCTTAGGCCATCTCCAGCAGGCTGTGTAACAGCCGTGCAAAATGTTGTTTTGCA  
CTGTTTGTACAGTGAAGTTTTAAATAAAGAGTAAGATAGGAAATGAGATAAAGAGTATTCTGGAGATAGTCTTATACATCACCGTAGCAACGCATT  
AATATATACCTAGTTAATATTATATGATTTAAATTTTATCTTAAATACTTGACGCTCTATGAGTTTAGTAGTTTATAATACATATTTATCTTCTTAA  
TACATGAACATCCTTTTTAGAATACGTCATAGGACGATACCAGTACGGAGGATCTAGGCAAACAACATAAGAATCGAGCGAGTGCTAGGAGCATC  
TCTAAAAGACTAATAAAATAACTCGTAAAGTTAAATTTTATAGATACTCAAGAGTAAATAAATACTATTTAACAGACTCGTTATTTGACTCATCAATATACC  
CTTCAAATTGACTCTCTCACTATCTAAACTTGGCTAGCCACTATGACTAACTAACTAGATAGATATTTTGGTGGAGTAAGATGCTATATATAAAGTG  
TAATATTTATAAAATGATAAATAAAAAGCTAAAAATAAAGAGTTACTTCTCTAAGCACGCTCGTGTCCAAGCGTCACTTACGATTAGC

>ID664\_HR2 junction PCR product (P5/P4), *ARGOS8-v2*

ACCGTCCTATCTCTGCATCATCTATCTGTGCTAGTTTCTGCGTCTTCTCAAATATTTCCGGCCTGTGTAGCATGTGACTGATAATATGATTTTGCA  
GCTTCTGCATAAGAACAACAAATCAAAAGCTTGATCAGCTCGGTGCTACAAAACCTCAACAACCAAGTTTCCATGGTACGGATAGATATGATGCT  
GCACTGCACATTGGCTATATCTGAGGCTCCTGCGCGCGCTTGGCCAGGTGTCTGTCTGCGGGCGATGCCGAGGAAGAGGAAGCCGCGGTGG  
CGACGACGACCATGCCGGGGGCAAGGTGGCGCGCTGCTGGCCAGCGCGCCGCGCTGCTGCTGCTGCCGCTGCCGCTGCCGCGCTGCC  
GCCGCGCCACGCAGCTGTTGTTGTCGCCGTGTTGCTGCTCCTCGTGGCGTCCCTCGCTTCTGCCCGCGCGACCCCTCGCGTCCCG  
ATGCATGCCGCGACCCAGGTCGTTCCGGACCACTGGATCACCGCACCTATGTTGACGCTGACGATGAGAGATCTGCTGATCGACGCTCGGCT  
TGCAATGGCGCGTGGAAATCAAGCAGTTTCGCACAC

>ID336\_PCR product (P1/P4), *ARGOS8-v3*

GCGCCATCCCTAAAGGTAAGTAACTAAACAGAACACAATTTTCTTAGGCCATCTCCAGCAGGCTGTGTAACAGCCGTGCAAAATGTTGTTTTGCA  
CTGTTTGTACAGTGAAGTTTTAAATAAAGAGTAAGATAGGAAATGAGATAAAGAGTATTCTGGAGATAGTCTTATACATCACCGTAGCAACGCATT  
AATATATACCTAGTTAATATTATATGATTTAAATTTTATCTTAAATACTTGACGCTCTATGAGTTTAGTAGTTTATAATACATATTTATCTTCTTAA  
TACATGAACATCCTTTTTAGAATACGTCATAGGACGATACCAGTACGGAGGATCTAGGCAAACAACATAAGAATCGAGCGAGTGCTAGGAGCATC  
TCTAAAAGACTAATAAAATAACTCGTAAAGTTAAATTTTATAGATACTCAAGAGTAAATAAATACTATTTAACAGACTCGTTATTTGACTCATCAATATACC  
CTTCAAATTGACTCTCTCACTATCTAAACTTGGCTAGCCACTATGACTAACTAACTAGATAGATATTTTGGTGGAGTAAGATGCTATATATAAAGTG  
TAATATTTATAAAATGATAAATAAAAAGCTAAAAATAAAGAGTTACTTCTCTAAGCACTCGTGGCGCGGGTCCGGCGGGGGCTGCTGTGAGG  
GCAAATTTATATAGGTCTAGTGGTACCCGGCTACGGATAGATATGATGCTGCACTGCACATTGGCTATATCTGAGGCTCCTGCGCGCGCTTGGC  
CAGGTGTCTGTCTGCGGGCGATCCGCGAGGAAGGAAAGCGCGGTGGCGACGACCATGGCCGGGGCAAGGTGGCGCGCTGCTGGC  
CACGGCGCGCGCTGCTGCTGCTGCCGCTGGCGCTGCCCGCTGCCGCGCCACGCAGCTGTTGTTGCTCCCCGTGGTCTGCTGCT  
CCTCGTGGCGTCCCTCGCTTCTGCCCGCGCGACCCCTCGCGTCCGCGATGCATGCCGCGACCCAGGGTCTTCCGGACCACTGGATCACC  
GCACCTATGTTGACGCTGACGATGAGAGATCTGCTGATCGACGCTCGGCTTGCATGGCGCTCGGAATCAAGCAGTTTCGCACA

**Figure S4.** DNA sequences of the junction PCR products amplified from *ARGOS8* variants

**Table S1.** Frequency of the GOS2 promoter insertion with one target site and the promoter swap with two target sites in T0 maize plants

|                                          | Insertion | Swap          |
|------------------------------------------|-----------|---------------|
| Target sites                             | CTS1      | CTS2 and CTS3 |
| No. of embryos bombarded                 | 1050      | 1150          |
| No. of shoots regenerated                | 194       | 334           |
| No. of shoots with CTS modified          | 190       | 172 *         |
| No. of shoots positive with junction PCR | 7         | 23            |
| HR1 junction-PCR positive                | 2         | 9             |
| HR2 junction-PCR positive                | 3         | 11            |
| Both junction-PCR positive               | 2         | 3             |
| No. of T0 plants regenerated             | 3         | 8             |
| HR1 junction-PCR positive                | 1         | 3             |
| HR2 junction-PCR positive                | 1         | 3             |
| Both junction-PCR positive               | 1         | 2             |

\* Both CRISPR-RNA target site 2 (CTS2) and CTS3 were modified.

**Table S2.** Primers and probes used for generation and characterization of *ARGOS8* genome editing variants

| Target              | PCR type | Primer name | Primer type | Primer sequence (5'-3')         |
|---------------------|----------|-------------|-------------|---------------------------------|
| CTS1                | qPCR     | P11         | Forward     | CCTCTCCAACCCCAAATCCA            |
|                     |          | P12         | Reverse     | CCACTAGACCTATATAAATTTGCCCTCA    |
|                     |          |             | Probe       | CGCCAGCGATGGAT                  |
| CTS2                | qPCR     | P13         | Forward     | TGTGAGGGCAAATTTATATAGGTCTAGTG   |
|                     |          | P14         | Reverse     | AGCCTCAGATATAGCCAATGTGCA        |
|                     |          |             | Probe       | CCGGCTACGGATAGA                 |
| CTS3                | qPCR     | P15         | Forward     | AGATAGATATTTTGGTGGAGTAAGATGCT   |
|                     |          | P16         | Reverse     | GCTAGTACTAGTAGAGGACTAGAGGCCTG   |
|                     |          |             | Probe       | AATCCAGCCGTGCTT                 |
| HR1 junction        | PCR      | P1          | Forward     | GCGCCATTCCCTAAAGGTAAC           |
|                     |          | P2          | Reverse     | GCTAATCGTAAGTGACGCTTGGA         |
| HR2 junction        | PCR      | P5          | Forward     | ACCGTCCTTATCTCTGCATCATCT        |
|                     |          | P4          | Reverse     | GTGTGCGAACTGCTTGATCCG           |
| HR2 junction        | PCR      | P3          | Forward     | GCTCGTGTCCAAGCGTCACTTACGATTAGCT |
|                     |          | P4          | Reverse     | GTGTGCGAACTGCTTGATCCG           |
| <i>ARGOS8</i> locus | Long PCR | P1          | Forward     | GCGCCATTCCCTAAAGGTAAC           |
|                     |          | P4          | Reverse     | GTGTGCGAACTGCTTGATCCG           |
| Cas9                | PCR      | P21         | Forward     | AACTGGTGGACAGCACAGACAA          |
|                     |          | P22         | Reverse     | GAAGTGGCCGCGAACT                |
|                     |          |             | Probe       | CTCGGCATATGAT                   |
| sgRNA               | PCR      | P23         | Forward     | CTAATCACAAGAGTGGAGCGTACCTT      |
|                     |          | P24         | Reverse     | AGCCTTATTTAACTTGCTATTTCTAGCTCT  |
|                     |          |             | Probe       | CCGAGCCGCAAGCA                  |
| PMI                 | PCR      | P25         | Forward     | CGCCGGAGATATCGTTTCA             |
|                     |          | P26         | Reverse     | CCTCTCCGAGCAGAGTCGATT           |
|                     |          |             | Probe       | CTCAATCACATCACGCA               |
| ODP2                | PCR      | P27         | Forward     | TTGGTGTTACTTCTGCAGGTCGA         |
|                     |          | P28         | Reverse     | AGAGGGAGAAAGCGAGCCAGT           |
|                     |          |             | Probe       | ATCCATGGCCACTGTGAA              |
| WUS                 | PCR      | P29         | Forward     | CTCCCTGCACCTGCCATG              |
|                     |          | P30         | Reverse     | GCTGCCGCTGCCTCCTC               |
|                     |          |             | Probe       | CGCTGAGATAGAGGCATG              |

**Table S3.** Plant height (PLTHT), ear height (EARHT) and grain moisture (MST) of *ARGOS8* genome edited variants and wild type under flowering stress, grain-filling stress and optimal (well-watered) conditions.

|                                   | PLTHT<br>(cm) | EARHT<br>(cm) | MST<br>% |
|-----------------------------------|---------------|---------------|----------|
| <i>Flowering Stress (FS)</i>      |               |               |          |
| <i>ARGOS8-v1</i>                  | 213.1         | 94.2          | 20.1     |
| <i>ARGOS8-v2</i>                  | 213.1         | 95.0          | 20.4     |
| WT                                | 213.5         | 92.8          | 20.3     |
| <i>Optimal (OPT)</i>              |               |               |          |
| <i>ARGOS8-v1</i>                  | 273.3         | 143.0         | 21.4     |
| <i>ARGOS8-v2</i>                  | 275.6*        | 144.5*        | 21.6     |
| WT                                | 273.0         | 141.3         | 21.5     |
| <i>Grain-filling Stress (GFS)</i> |               |               |          |
| <i>ARGOS8-v1</i>                  | nd            | nd            | 18.2*    |
| <i>ARGOS8-v2</i>                  | nd            | nd            | 18.7     |
| WT                                | nd            | nd            | 19.0     |

Asterisks indicate predicted difference significant at  $P < 0.1$ . nd, not determined.
